# Supplementary material for: Production of Nattokinase from Hemp Seed Meal by Solid-State Fermentation and Improvement of Its Nutritional Quality
Source: MDPI journal article supplement (doi:10.3390/fermentation9050469), 2023-05-13
Supplement: s1 [file s1]

**Table S1** PB Design results

| No. | Initial<br>ratio of<br>HSM to<br>water<br>(v : w) | Thickness<br>of the<br>substrate<br>(cm) | Bacterial<br>inoculum<br>volume<br>(v : w) | Relative<br>numidity<br>(%) | Temperature<br>(°C) | Time (h) | Nattokinase<br>activity<br>(IU/g) |
|-----|---------------------------------------------------|------------------------------------------|--------------------------------------------|-----------------------------|---------------------|----------|-----------------------------------|
| 1   | 1 : 2.5                                           | 4                                        | 8                                          | 80                          | 40                  | 24       | 5789.7±134.2                      |
| 2   | 1 : 1.5                                           | 4                                        | 12                                         | 70                          | 40                  | 24       | 5934.7±189.2                      |
| 3   | 1 : 2.5                                           | 2                                        | 12                                         | 80                          | 30                  | 24       | 6208.5±256.7                      |
| 4   | 1 : 1.5                                           | 4                                        | 8                                          | 80                          | 40                  | 16       | 5895.4±253.5                      |
| 5   | 1 : 1.5                                           | 2                                        | 12                                         | 70                          | 40                  | 24       | 6373.6±96.3                       |
| 6   | 1 : 1.5                                           | 2                                        | 8                                          | 80                          | 30                  | 24       | 6303.8±258.1                      |
| 7   | 1 : 2.5                                           | 2                                        | 8                                          | 70                          | 40                  | 16       | 6215.2±213.6                      |
| 8   | 1 : 2.5                                           | 4                                        | 8                                          | 70                          | 30                  | 24       | 6019.4±237.4                      |
| 9   | 1 : 2.5                                           | 4                                        | 12                                         | 70                          | 30                  | 16       | 5914.6±268.9                      |
| 10  | 1 : 1.5                                           | 4                                        | 12                                         | 80                          | 30                  | 16       | 6071.2±184.2                      |
| 11  | 1 : 2.5                                           | 2                                        | 12                                         | 80                          | 40                  | 16       | 5931.4±209.8                      |
| 12  | 1 : 1.5                                           | 2                                        | 8                                          | 70                          | 30                  | 16       | 6747.1±85.3                       |

**Table S2** BBD results

| No. | Initialratio of<br>HSM to<br>water(v : w) | Thickness of<br>the<br>substrate(cm) | Relative<br>numidity(%) | Temperature(<br>°C) | Nattokinase<br>activity (IU/g) |
|-----|-------------------------------------------|--------------------------------------|-------------------------|---------------------|--------------------------------|
| 1   | 1 : 1.5                                   | 2                                    | 75                      | 35                  | 6363.4±234.3                   |
| 2   | 1 : 2.5                                   | 2                                    | 75                      | 35                  | 6438.2±87.9                    |
| 3   | 1 : 1.5                                   | 4                                    | 75                      | 35                  | 6295.7±124.4                   |
| 4   | 1 : 2.5                                   | 4                                    | 75                      | 35                  | 6236.5±133.7                   |
| 5   | 1 : 2                                     | 3                                    | 70                      | 30                  | 6713.5±156.3                   |
| 6   | 1 : 2                                     | 3                                    | 80                      | 30                  | 6746.7±216.5                   |
| 7   | 1 : 2                                     | 3                                    | 70                      | 40                  | 6769.8±230.6                   |
| 8   | 1 : 2                                     | 3                                    | 80                      | 40                  | 6772.7±156.9                   |
| 9   | 1 : 1.5                                   | 3                                    | 75                      | 30                  | 6585.8±147.2                   |
| 10  | 1 : 2.5                                   | 3                                    | 75                      | 30                  | 6663.7±184.9                   |
| 11  | 1 : 1.5                                   | 3                                    | 75                      | 40                  | 6838.3±173.4                   |
| 12  | 1 : 2.5                                   | 3                                    | 75                      | 40                  | 6508.4±166.2                   |
| 13  | 1 : 2                                     | 2                                    | 70                      | 35                  | 6635.1±202.6                   |
| 14  | 1 : 2                                     | 4                                    | 70                      | 35                  | 6646.9±152.7                   |
| 15  | 1 : 2                                     | 2                                    | 80                      | 35                  | 6786.8±172.3                   |
| 16  | 1 : 2                                     | 4                                    | 80                      | 35                  | 6543.9±98.4                    |
| 17  | 1 : 1.5                                   | 3                                    | 70                      | 35                  | 6579.3±109.5                   |
| 18  | 1 : 2.5                                   | 3                                    | 70                      | 35                  | 6381.3±127.4                   |
| 19  | 1 : 1.5                                   | 3                                    | 80                      | 35                  | 6482.4±143.7                   |
| 20  | 1 : 2.5                                   | 3                                    | 80                      | 35                  | 6518.2±138.1                   |
| 21  | 1 : 2                                     | 2                                    | 75                      | 30                  | 6956.4±163.3                   |
| 22  | 1 : 2                                     | 4                                    | 75                      | 30                  | 6602.4±177.8                   |
| 23  | 1 : 2                                     | 2                                    | 75                      | 40                  | 6743.7±185.2                   |
| 24  | 1 : 2                                     | 4                                    | 75                      | 40                  | 6734.9±107.4                   |
| 25  | 1 : 2                                     | 3                                    | 75                      | 35                  | 7098.5±132.8                   |
| 26  | 1 : 2                                     | 3                                    | 75                      | 35                  | 7003.2±146.2                   |
| 27  | 1 : 2                                     | 3                                    | 75                      | 35                  | 7181.4±87.3                    |
| 28  | 1 : 2                                     | 3                                    | 75                      | 35                  | 7076.3±118.9                   |
| 29  | 1 : 2                                     | 3                                    | 75                      | 35                  | 7117.8±105.9                   |
